1 Inhibiting *Mycobacterium tuberculosis* CoaBC by targeting a new  
2 allosteric site.

3

4 Vitor Mendes<sup>1\*</sup>, Simon R. Green<sup>2</sup>, Joanna C. Evans<sup>3</sup>, Jeannine Hess<sup>4</sup>, Michal  
5 Blaszczyk<sup>1</sup>, Christina Spry<sup>4</sup>, Owain Bryant<sup>1</sup>, James Cory-Wright<sup>1</sup>, Daniel S-H. Chan<sup>4</sup>,  
6 Pedro H.M. Torres<sup>1</sup>, Zhe Wang<sup>5</sup>, Sandra O'Neill<sup>2</sup>, Sebastian Damerow<sup>2</sup>, John Post<sup>2</sup>,  
7 Tracy Bayliss<sup>2</sup>, Sasha L. Lynch<sup>3</sup>, Anthony G. Coyne<sup>4</sup>, Peter C. Ray<sup>2</sup>, Chris Abell<sup>4</sup>, Kyu  
8 Y. Rhee<sup>5</sup>, Helena I. M. Boshoff<sup>6</sup>, Clifton E. Barry III<sup>3,6</sup>, Valerie Mizrahi<sup>3</sup>, Paul G.  
9 Wyatt<sup>2</sup>, Tom L. Blundell<sup>1\*</sup>.

10

11 1 Department of Biochemistry, University of Cambridge, 80 Tennis Court Road, Cambridge, CB2 1GA,  
12 UK

13 2 Drug Discovery Unit, College of Life Sciences, University of Dundee, Dow Street, Dundee, DD1 5EH,  
14 Scotland, UK

15 3 MRC/NHLS/UCT Molecular Mycobacteriology Research Unit & DST/NRF Centre of Excellence for  
16 Biomedical TB Research & Wellcome Centre for Infectious Diseases Research in Africa, Institute of  
17 Infectious Disease and Molecular Medicine and Department of Pathology, Faculty of Health Sciences,  
18 University of Cape Town, Anzio Road, Observatory 7925, South Africa

19 4 Department of Chemistry, University of Cambridge, Lensfield Road, Cambridge, CB2 1EW, UK

20 5 Division of Infectious Diseases, Weill Department of Medicine, Weill Cornell Medical College, New  
21 York, NY 10065, USA

22 6 Tuberculosis Research Section, Laboratory of Clinical Immunology and Microbiology, National  
23 Institute of Allergy and Infectious Disease, National Institutes of Health, 9000 Rockville Pike, Bethesda,  
24 Maryland 20892, USA

25

26 \* To whom correspondence should be addressed

27 Vitor Mendes: vgm23@cam.ac.uk

28 Tom L. Blundell: tom@cryst.bioc.cam.ac.uk

29 **Abstract**

30 Coenzyme A (CoA) is a fundamental co-factor for all life, involved in numerous  
31 metabolic pathways and cellular processes, and its biosynthetic pathway has raised  
32 substantial interest as a drug target against multiple pathogens including *Mycobacterium*  
33 *tuberculosis*. The biosynthesis of CoA is performed in five steps, with the second and  
34 third steps being catalysed in the vast majority of prokaryotes, including *M.*  
35 *tuberculosis*, by a single bifunctional protein, CoaBC. Depletion of CoaBC was found  
36 to be bactericidal in *M. tuberculosis*. Here we report the first structure of a full-length  
37 CoaBC, from the model organism *Mycobacterium smegmatis*, describe how it is  
38 organised as a dodecamer and regulated by CoA thioesters. A high-throughput  
39 biochemical screen focusing on CoaB identified two inhibitors with different chemical  
40 scaffolds. Hit expansion led to the discovery of potent inhibitors of *M. tuberculosis*  
41 CoaB, which we show to bind to a novel cryptic allosteric site within CoaB.

42

43

44

45

46

47

48

49

50

51

52

53

54 **Introduction**

55 Tuberculosis (TB) is the most prevalent and deadly infectious disease worldwide and  
56 remains a global epidemic. Despite the availability of treatment, this disease, caused by  
57 *Mycobacterium tuberculosis*, still claims 1.5 million lives each year <sup>1</sup>. Current treatment  
58 regimens are long, which presents an obstacle for patient adherence and imposes a  
59 heavy social and economic burden on countries with a high incidence of TB. It is  
60 therefore critical to explore novel targets and find new and more effective drugs to  
61 combat this disease.

62 Coenzyme A (CoA) is an essential and ubiquitous cofactor involved in numerous  
63 metabolic pathways with a large number of different enzymes requiring it for their  
64 activity<sup>2</sup>. CoA is essential for the synthesis of phospholipids, fatty acids, polyketides,  
65 and non-ribosomal peptides, for the operation of the tricarboxylic acid cycle and in the  
66 degradation of lipids <sup>3</sup>. The importance of CoA for essential post-translational  
67 modifications of proteins is also well established in both eukaryotes and prokaryotes,  
68 with various proteins post-translationally modified by thioester derivatives of CoA  
69 (acylation) or CoA itself (phosphopantetheinylation and CoAlation), while several other  
70 post-translational modifications depend indirectly on CoA through the mevalonate  
71 pathway <sup>4-7</sup>. Furthermore, dephospho-CoA, an intermediate of the CoA pathway, is  
72 incorporated into some RNA transcripts during transcription initiation thereby serving  
73 as a non-canonical transcription initiating nucleotide <sup>8</sup>. These RNA modifications have  
74 functional consequences and occur in both eukaryotes and bacteria <sup>8</sup>. In *M. tuberculosis*,  
75 CoA plays a pivotal role in the biosynthesis of complex lipids that are crucial  
76 components of the cell wall and required for pathogenicity <sup>9</sup>. It is also needed for the  
77 degradation of lipids, including cholesterol, which are the primary source of energy for  
78 this organism during infection <sup>10,11</sup>. Given its ubiquitous nature, wide metabolic and

79 functional impact of its inhibition, and lack of sequence conservation between  
80 prokaryotes and humans, the CoA pathway is therefore an attractive pathway for drug  
81 discovery for many different infectious diseases, including TB.

82 The biosynthesis of CoA from pantothenic acid (vitamin B<sub>5</sub>) is performed in five steps,  
83 sequentially catalysed by the enzymes pantothenate kinase (CoaA, also known as  
84 PanK), phosphopantothenoylcysteine synthetase (CoaB), phosphopantothenoylcysteine  
85 decarboxylase (CoaC), phosphopantetheine adenylyltransferase (CoaD) and dephospho-  
86 CoA kinase (CoaE). However, in the vast majority of prokaryotes, including *M.*  
87 *tuberculosis*, CoaB and CoaC are encoded by a single gene to produce a fused  
88 bifunctional enzyme (CoaBC). Transcriptional silencing of individual genes of the CoA  
89 biosynthetic pathway of this pathogen identified CoaBC as uniquely bactericidal within  
90 the CoA pathway, highlighting it as a good candidate for drug discovery<sup>12</sup>.

91 CoaBC converts 4'-phosphopantothenate to 4'-phosphopantetheine in three steps. First,  
92 4'-phosphopantothenate (PPA) reacts with CTP to form 4'-phosphopantothenoyl-CMP  
93 with the release of pyrophosphate. This intermediate subsequently reacts with cysteine  
94 to form 4'-phosphopantothenoylcysteine (PPC) with the release of CMP, with these two  
95 steps being catalysed by CoaB. The product of CoaB is then decarboxylated by CoaC,  
96 an enzyme of the homo-oligomeric flavin-containing decarboxylase (HFCD) protein  
97 family, to 4'-phosphopantetheine. X-ray crystal structures have been reported for the  
98 individual CoaB and CoaC enzymes in several organisms, including a structure of CoaB  
99 from *Mycobacterium smegmatis*, a close relative of *M. tuberculosis*. However, a  
100 structure of a full-length bifunctional CoaBC had not been determined.

101 Here we report the structure of the bifunctional CoaBC of *M. smegmatis* at 2.5 Å. We  
102 identify a previously unknown allosteric site in CoaB and crucially, we report the  
103 discovery of the first *M. tuberculosis* CoaBC allosteric inhibitors. Using X-ray

104 crystallography and enzyme kinetic experiments, we define the mode of binding of one  
105 of the inhibitors and show its impact on the protein structure and function. These results  
106 further illustrate the potential of CoaBC as a novel drug target in *M. tuberculosis*.

107

## 108 **Results**

### 109 **Overall structure of CoaBC**

110 As the HFCD protein family of flavin-binding proteins are known to form homo-  
111 oligomers<sup>13</sup>, we performed native electrospray-ionization mass spectrometry (ESI-MS)  
112 to investigate the stoichiometry of CoaBC, previously proposed to form a dodecamer<sup>13</sup>.  
113 Both *M. tuberculosis* CoaBC (MtbCoaBC) (Figure S1A) and *M. smegmatis* CoaBC  
114 (MsmCoaBC) (Figure S1B) exclusively exhibited a dodecameric assembly, with no  
115 other oligomeric species observed in the spectra, which is consistent with a strong  
116 interaction between the subunits of the complex. The dodecamer of MtbCoaBC was  
117 centred around the 56+ charge state, with an observed mass of 537 kDa, while the  
118 dodecamer of MsmCoaBC was centred around the 52+ charge state, with an observed  
119 mass of 523 kDa. These masses are 1-2% higher than the expected masses of 525 and  
120 518 kDa for MtbCoaBC and MsmCoaBC respectively, which can be attributed to the  
121 non-specific binding of solvent molecules or ions to the protein complexes under the  
122 soft ionization conditions employed.

123 Structures of a few proteins of the HFCD family have been determined<sup>14-18</sup>. All of these  
124 structures show either a homo-trimeric or homo-dodecameric arrangement of the flavin-  
125 containing Rossmann-fold with trimers forming at each of the vertices of the  
126 tetrahedron in the case of a dodecameric arrangement<sup>15</sup>. However, all of these proteins,  
127 unlike CoaBC, contain only a single functional domain. We solved the structure of  
128 MsmCoaBC (PDB: 6TGV) at 2.5 Å resolution (Figure 1A), in the presence of CTP and

129 FMN (Figure 1B, S2A and S2B), using crystals belonging to the  $H3_2$  space group with  
130 an asymmetric unit containing four protomers forming two CoaBC dimers. Data  
131 collection and refinement statistics are summarised in (Table S1). The final model  
132 (residues 2-412) covers both CoaC and CoaB, but densities for several residues in three  
133 loop regions in CoaB are not observed (residues 290-298, 336-342, 363-376).  
134 Nevertheless, all these residues except for 375 and 376, can be seen in the MsmCoaB  
135 X-ray crystal structure (PDB: 6TH2) that we also solved in this work at 1.8 Å. The N-  
136 terminal CoaC of MsmCoaBC (residues 1-179) forms the same type of dodecameric  
137 arrangement seen in other HFCD family proteins, such as the peptidyl-cysteine  
138 decarboxylase EpiD<sup>15</sup>, and it sits at the core of the dodecamer (Figure 1A and 1C) with  
139 the two domains connected through a small loop region (residues 180-189) that tightly  
140 interacts with both. The active site of CoaC sits at the interface between two protomers  
141 of one CoaC trimer and a protomer of an adjacent CoaC trimer with the FMN site  
142 facing inwards towards the hollow centre of the dodecamer (Figure 2A). A previously  
143 described flexible flap that encloses the reaction intermediate bound to *Arabidopsis*  
144 *thaliana* CoaC<sup>19</sup> is also observed in some of the protomers, but in an open  
145 conformation (Figure 1B).

146 The C-terminal CoaB of MsmCoaBC also displays a Rossmann fold consistent with  
147 several other CoaB structures solved previously, including both the eukaryotic form, in  
148 which CoaB exists as an individual polypeptide, and the bacterial form where CoaB is  
149 typically fused with CoaC<sup>20-22</sup>. Each CoaB of MsmCoaBC (residues 190-414)  
150 dimerises with a CoaB belonging to an adjacent trimer (Figure 1C). The full protein  
151 resembles a tetrahedron with CoaB dimers positioned at the six edges and CoaC trimers  
152 at the four vertices (Figure 1A).

153 The shortest distance between a pair of CoaB and CoaC active sites is  $\sim 30$  Å (Figure  
154 2B). Nevertheless, a flexible loop (residues 362-377) that covers the 4'-  
155 phosphopantothenate site, when this substrate binds to the enzyme<sup>20</sup>, can be seen in our  
156 MsmCoaB structure, extending away from the active site. A superposition of our  
157 MsmCoaB dimer structure with MsmCoaBC shows the loop extending towards the  
158 CoaC active site (Figure 2B). This long loop (15-16 amino acids) is present in all  
159 CoaBCs (Figure S3) and it is possible that it helps channelling the substrate from the  
160 CoaB to the CoaC active site.

161 The small differences (RMSD = 1.147) in overall structure of CoaB dimers in the full  
162 length MsmCoaBC and the MsmCoaB crystal structure solved at 1.8 Å (Figure S4) can  
163 be attributed to artefacts of crystal packing. Similarly, the CoaC structure does not seem  
164 to differ between full length MsmCoaBC and the available individual CoaC structures.  
165 However, when MsmCoaB (residues 186-414) is expressed alone, the protein does not  
166 dimerise in solution and is inactive (not shown). This contrasts with *E. coli* CoaB,  
167 which still dimerises and is functional when expressed on its own without the N-  
168 terminal CoaC<sup>23,24</sup>. The CoaB dimer interface is mostly conserved, but there are clear  
169 differences in the dimerisation region between MsmCoaB and *E. coli* CoaB that could  
170 help to explain the different observed oligomerisation patterns (Figure S3). The absence  
171 of dimerisation for the MsmCoaB when expressed alone suggests that the interactions  
172 between CoaC and CoaB in *M. smegmatis*, and likely all other *Mycobacteriaceae*, are  
173 fundamental for CoaB dimerisation and activity. This idea is reinforced by the fact that  
174 the residues located at the interface of the two enzymes (CoaB and CoaC) are well  
175 conserved in all *Mycobacteriaceae* and somewhat conserved in the sub-order  
176 *Corynebacterineae*, but not outside of this group (Figure S3).

177 The CoaB dimerisation region forms a  $\beta$ -sandwich composed of eight anti-parallel  $\beta$ -  
178 strands, related by 2-fold symmetry, that contacts with the active site (Figure 2C and  
179 2D). Comparison of the MsmCoaB with human CoaB reveals that the human and many  
180 other eukaryotic CoaBs <sup>21</sup> possess two extra  $\alpha$ -helices and  $\beta$ -strands involved in the  
181 dimerisation interface that help stabilise the dimer in the absence of CoaC (Figure S5).  
182 The CoaB active site is enclosed by a loop that extends from the opposing protomer and  
183 is observed for the first time in this work. This loop contains a motif “K-X-K-K”, which  
184 is widely conserved in bacteria (Figure S3), with few exceptions, and each lysine either  
185 interacts directly with the triphosphate group of CTP or through highly coordinated  
186 waters (Figure 2C). Also observed for the first time is the coordination of a cation by  
187 the triphosphate group and D281 (Figure 2C and S6). While magnesium or manganese  
188 are the favoured cations for CoaB activity <sup>25</sup>, calcium is observed in our structures  
189 instead, due to the high concentration present in the crystallization condition.

190

### 191 **CoaBC is regulated by CoA thioesters**

192 It is known that CoA biosynthesis is regulated, in many organisms, at the first step of  
193 the pathway, which is catalysed by the enzyme CoaA <sup>3</sup>. *M. tuberculosis* and many other  
194 mycobacteria possess a CoaA (type I PanK) as well as CoaX (type III PanK). However,  
195 only the type I PanK seems to be active based on studies in *M. tuberculosis* <sup>26</sup>. CoA and  
196 its thioesters competitively inhibit *E. coli* CoaA by binding to the ATP site, with CoA  
197 being the strongest regulator <sup>27,28</sup>. Nevertheless, at physiologically relevant levels of  
198 CoA there is only a low level inhibition of CoaA <sup>28</sup>. It is also known that *M.*  
199 *tuberculosis* CoaD, the enzyme that catalyses the fourth step of the pathway, is  
200 competitively inhibited by CoA and its product dephospho-CoA <sup>29,30</sup>. However, nothing  
201 was known about the regulation of CoaBC in any organism. We therefore examined the



202 effect of CoA and several of its thioesters (acetyl-CoA, malonyl-CoA and succinyl-  
203 CoA) on MtbCoaBC activity, using a coupled enzymatic assay that quantifies the  
204 release of pyrophosphate (EnzChek pyrophosphate assay). Controls were performed to  
205 assess the activity of these compounds against the two coupling enzymes and the  
206 compounds showed an absence of inhibition at the tested range of concentrations.  
207 Inhibition of CoaB activity by CoA and acyl-CoAs was observed, with IC<sub>50</sub> values  
208 ranging from 38 to 148 μM, far below the predicted intracellular concentrations of acyl-  
209 CoAs<sup>31</sup>, with succinyl-CoA displaying the highest inhibition (Figure 3A and Table 1).  
210 Competition assays with the three substrates and acetyl-CoA show a competitive mode  
211 of inhibition relative to CTP and PPA with a  $K_i$  of 22.5 and 22.4 μM respectively, and  
212 non-competitive inhibition for L-cysteine with a  $K_i$  of 62.5 μM (Figure 3B and Table 2).  
213 In the absence of a crystal structure to confirm the mode of binding, these results  
214 suggest that acyl-CoAs most likely bind to the active site itself, competing directly with  
215 CTP and PPA. Interestingly, both acyl-CoAs, involved in fatty acid synthesis, as well as  
216 those involved in the TCA cycle, show inhibition of CoaB, with larger fatty acyl chains  
217 showing higher inhibition of CoaB (Figure 3A).

218

### 219 **Identification of CoaB inhibitors using high-throughput screening**

220 Although the CoA biosynthetic pathway is considered an attractive target for drug  
221 discovery, CoA pathway inhibitors displaying potent whole cell activity are rare and the  
222 few CoaBC inhibitors that have been reported to date are in majority substrate  
223 mimicking<sup>24,32</sup>.

224 In order to identify novel MtbCoaBC inhibitors, we have conducted a high-throughput  
225 screen of 215,000 small molecules targeting CoaB activity. To do this, an end-point  
226 pyrophosphate quantification assay was used (Biomol Green). The most potent hits

227 identified were compounds **1a** and **2a** with  $IC_{50}$  values of 9 and 3.1  $\mu$ M respectively  
228 (Table S2), originating from two different but related chemical scaffolds. A search was  
229 then performed for commercially available analogues. Testing of analogues of the initial  
230 hits resulted in the identification of more potent compounds with sub-micromolar  $IC_{50}$   
231 values (Table 1, Figure 4A, Table S2 and Figure S7). Of these, compounds **1b** and **2b**  
232 (Figure 4A and Table 1), with  $IC_{50}$  values of 0.28 and 0.08  $\mu$ M respectively, were  
233 identified as the most potent of the two chemical series and therefore were selected for  
234 further work.

235

### 236 **Elucidation of the mode of inhibition**

237 Following the identification of potent MtbCoaB inhibitors we went on to determine  
238 their mode of inhibition using kinetic assays. For this, the EnzChek coupled enzyme  
239 assay that measures the release of pyrophosphate was used. Control experiments were  
240 first performed to assess compound activity against the two coupling enzymes and the  
241 compounds were found to be inactive at 100  $\mu$ M. The  $IC_{50}$  values for the compounds  
242 against MtbCoaB were re-determined with this assay and the values obtained were in  
243 line with the primary screening assay (Table S2).

244 Competition experiments were then performed between the three CoaB substrates and  
245 the two most potent compounds of each chemical series (**1b** and **2b**). Compound **1b**  
246 showed uncompetitive inhibition for all substrates with a  $\alpha K_i$  of 0.222, 0.078 and 0.173  
247  $\mu$ M respectively for CTP, PPA and L-cysteine (Figure 4B and Table 2), consistent with  
248 the compound binding preferentially when the three substrates are bound. Compound  
249 **2b** shows mixed inhibition relative to CTP with a  $K_i$  of 0.093  $\mu$ M and uncompetitive  
250 inhibition for PPA and L-cysteine and PPA with a  $\alpha K_i$  respectively of 0.062 and 0.049  
251  $\mu$ M (Figure 4C and Table 2). It is known that CoaB forms the phosphopantothenoyl-

252 CMP intermediate in the absence of L-cysteine<sup>33</sup> and, due to spatial constraints, it is  
253 likely that cysteine can only bind at the active site after the release of pyrophosphate.  
254 The data is therefore consistent with compound **1b** preferentially binding after L-  
255 cysteine enters the active site, for the last step of catalysis and the formation of 4'-  
256 phosphopantothencycysteine and CMP. However, compound **2b** shows a mixed  
257 inhibition for CTP, reflecting a slightly different mechanism of action. These results  
258 obtained for both compounds suggest the existence of an allosteric site in the CoaB  
259 moiety of MtbCoaBC.

260

#### 261 **Structural basis for inhibition of CoaB by allosteric inhibitors**

262 In order to elucidate the binding mode of compound **1b** we used a truncation of the  
263 MsmCoaB (residues 187-414) that was previously crystallized before by others in the  
264 presence of CTP (PDB code: 4QJI) at 2.65 Å resolution. The screening for new  
265 crystallization conditions allowed us to find a new CTP containing condition that gave  
266 excellent resolution (1.8 Å). Comparison of this structure with the full length  
267 MsmCoaBC (Figure S4) showed only minor differences that can be attributed to crystal  
268 packing. Hence this crystallization system could be used to validate CoaB inhibitors  
269 binding outside of the CTP site.

270 MsmCoaB was co-crystallized with CTP in the absence of compound **1b** and overnight  
271 soaking of the crystals with this compound was performed. A co-crystal structure of  
272 MsmCoaB with compound **1b** was obtained and showed that the compound was bound  
273 to a site at the dimer interface of CoaB, in a deep cavity that is occluded when the  
274 compound is absent (Figure 5A-B and S8). Each CoaB dimer contains two of these  
275 sites, which are formed by a sandwich of eight β-strands and a long loop that contains  
276 the conserved “K-X-K-K” motif. This site opens to the active site and the inhibitor also

277 contacts with D281 that is involved in the coordination of the cation (Figure 5C). The  
278 opening/closing of this cryptic allosteric site is mediated by the side chain of R207 of  
279 the opposing protomer (Figure 5D) that moves 5.5 Å at the furthest point and, to a  
280 smaller extent, by the side chain of F282 that moves 2 Å. R207 has previously been  
281 shown to be critical for the second half of the reaction catalysed by CoaB, the  
282 conversion of the 4'-phosphopantothenoil-CMP intermediate to *PPC*, with almost no  
283 conversion of the intermediate to *PPC* detected when this arginine is mutated to  
284 glutamine<sup>33</sup>. Given the position of this arginine, it is likely that it is involved in the  
285 binding of cysteine. Despite the absence of a crystal structure with cysteine, kinetic data  
286 showing uncompetitive inhibition with cysteine is consistent with this.

287 This allosteric site is comprised of a large group of hydrophobic residues (I209, F282  
288 L304 of protomer A and L203, I292, P299 and I302 of protomer B) many of which  
289 form hydrophobic interactions with compound **1b** (Figure 5C). Several  $\pi$ -interactions  
290 between the compound and the protein are also observed and involve D281 and F282 of  
291 protomer A and R207 of protomer B (Figure 5D). Hydrogen-bond interactions are  
292 formed with D281 and F282 of protomer A and R207 of protomer B. Water-mediated  
293 interactions are also observed for a group of residues that sit at the outer edge of the site  
294 (L203, H286 and D303) that is formed exclusively by protomer B (Figure 5C).

295 We propose that upon binding of L-cysteine, the R207 side chain moves towards the  
296 active site, and is likely involved in stabilizing/orienting L-cysteine to attack the  
297 phosphopantothenoil-CMP intermediate. This movement opens the allosteric site,  
298 which allows binding of allosteric inhibitors to the newly created cavity. The allosteric  
299 inhibitors will then stabilize the enzyme in its substrate bound state with the position of  
300 R207 becoming locked by several hydrogen-bonds with the side chain of D281 of  
301 protomer A, the backbone carbonyl group of I292 and the side chain of D204 of

302 protomer B, but also by the  $\pi$ -interactions with the compound (Figure 5C). The residues  
303 around this site and crucially R207 are conserved across many microorganisms,  
304 suggesting that this allosteric site is present in most, if not all bacterial CoaBCs (Figure  
305 S3 and S9A). Interestingly, even though overall sequence identity is very low between  
306 the human CoaB and MsmCoaB (22%), the human enzyme also contains an arginine  
307 equivalent to R207 and a roughly similar interface with several conserved residues, but  
308 there are stark differences in the relative position of the residues at this site between the  
309 two enzymes (Figure S9B).

310 While we were not able to obtain co-crystal structures with other inhibitors, *in silico*  
311 docking helped to provide a possible explanation for the structure-activity relationship  
312 observed for series one and two. The highest-scoring docking pose of compound **1b**, the  
313 most potent inhibitor of series one, was almost identical to that observed in the co-  
314 crystal structure (Figure S10A), and the analogues for which docking was performed  
315 adopted a similar binding pose. The lower activity of compound **1a** relative to  
316 compound **1b** could be explained by the loss of water-mediated hydrogen bonds (Figure  
317 5C, S10B), while the lower activity of compound **1c** could be explained by the loss of  
318 the carbonyl group which faces a highly electropositive area of the protein (Figure  
319 S10C). Compound **2b** is predicted to form direct hydrogen bonds at the bottom of the  
320 allosteric site, similar to those formed by compound **1b**, but also to interact directly with  
321 L203 and H286, forming extra hydrogen bonds at the top of the allosteric site (Figure  
322 6). For compound **1b** the interactions at the top of the site are water mediated (Figure  
323 5C). This could explain the higher potency of compound **2b**. Compounds **2c** and **2d** are  
324 also predicted to form direct hydrogen bond interactions at the top of the allosteric site,  
325 but the interactions at the bottom of the site are not as favourable due to the presence of  
326 extra hydroxyl groups (Figure S10D-F). The remaining compounds in series two, which

327 have fewer hydroxyl groups and/or hydroxyl groups in different positions, lose the  
328 ability to form hydrogen bonds, consistent with the weaker inhibitory effect observed  
329 (Table S2).

330

331

### 332 **Screening of CoaBC inhibitors against *M. tuberculosis***

333 The in vitro whole cell activity of the compounds was further evaluated by their ability  
334 to inhibit *M. tuberculosis* growth on different carbon sources. None of the compounds  
335 exhibited activity in media containing glycerol or cholesterol as the main carbon source  
336 (Table 3). We then tested whether the lack of inhibitory activity could be attributed to  
337 the presence of BSA by determining the whole cell activity of the three most potent  
338 inhibitors against *M. tuberculosis* in GAST/Fe minimal media. All the tested  
339 compounds exhibited moderate to low activity in this media with compound **2b**  
340 displaying the best activity of the three (Table 3). The observed differences in potency  
341 between the enzymatic assay and whole cell activity are likely related to low compound  
342 permeation, high efflux or metabolism.

343

### 344 **Discussion**

345 CoA is an essential co-factor ubiquitous across all domains of life. For many years, this  
346 pathway has been considered an attractive drug target to develop new antibiotics against  
347 a wide range of pathogens including *M. tuberculosis*<sup>34</sup>. Furthermore, the recent  
348 identification of CoaBC as a key fragility point in the CoA pathway of this organism<sup>12</sup>,  
349 combined with the extremely low sequence identity with the human CoaB (25%),  
350 makes this enzyme a highly attractive drug discovery target.

351 While a structure of an individual mycobacterial CoaB was available, we were aware  
352 that the many questions remaining at the start of this work about the organization and  
353 regulation of this bi-functional enzyme could have significant implications for drug  
354 discovery. We therefore set out to obtain a full-length structure of a mycobacterial  
355 CoaBC and we successfully solved the MsmCoaBC structure, which shares very high  
356 sequence identity with the *M. tuberculosis* orthologue (86% full-length, 84% CoaB  
357 enzyme) and hence is a valuable tool for studying *M. tuberculosis* CoaBC. The  
358 organization of CoaBC is similar to other HFCD family proteins<sup>15</sup> but unique in the  
359 sense that it contains more than one domain and highlights how the arrangement of the  
360 fused enzymes is essential for mycobacterial CoaB dimerisation and function. This  
361 fused arrangement might also help to channel the CoaB product to the CoaC active site  
362 more effectively. The human CoaB and other eukaryotic orthologues form stable dimers  
363 due to the extra dimerisation region (Figure S5), but is also known in yeast that the  
364 entire CoA pathway assembles into a metabolon centred on CoaC<sup>35,36</sup> (known as  
365 CAB3). This hints that close proximity between the different active sites of the CoA  
366 enzymes is desirable and that substrate channelling of products and substrates between  
367 different enzymes might be important in this pathway. It is not clear at this point if such  
368 an arrangement for the entire CoA pathway is also present in bacteria.

369 Regulation of the CoA biosynthesis pathway was known to occur for other enzymes of  
370 the pathway through feedback inhibition by CoA, but no information was available for  
371 CoaBC. We demonstrate that both CoA, as well as several CoA thioesters regulate  
372 CoaBC by inhibiting CoaB activity, and that these molecules act competitively for CTP  
373 and PPA and non-competitively for L-cysteine. This is consistent with these molecules  
374 binding to the CoaB active site but not to the L-cysteine sub-site. CoA and acyl-CoAs  
375 inhibit both CoaA and CoaD enzymes to varying extents<sup>28,30,37</sup>. However, the inhibitory

376 effect of CoA and its thioesters in the activity of these enzymes is lower when compared  
377 to what we observed in CoaBC and consequently the impact of the intracellular level of  
378 these molecules will be predominant in CoaBC. We therefore report a new and  
379 important mechanism of regulation of “*de novo*” CoA biosynthesis, mediated by the  
380 action of CoA thioesters on CoaBC. Since the reported intracellular levels of these  
381 molecules<sup>31</sup> are normally above the observed IC<sub>50</sub>, the activity of CoaBC is highly  
382 inhibited. This correlates well with previous work showing that “*de novo*” CoA  
383 biosynthesis closely matches dilution due to cell division<sup>38</sup>. However, the data for  
384 intracellular concentrations of CoA and CoA thioesters, as well as CoA half-life was not  
385 obtained for mycobacteria, and both interspecies differences along with variations in  
386 growth conditions may affect these conclusions.

387 Although the CoA pathway and CoaBC have been the subject of many drug discovery  
388 efforts, few non-substrate-mimicking inhibitors of CoaBC have been reported<sup>24</sup>. Our  
389 work identifies two related chemical scaffolds that potently inhibit the activity of the  
390 CoaB moiety of MtbCoaBC through a new cryptic allosteric site that sits in the dimer  
391 interface region of the CoaB enzyme. This site is closed in the CTP-bound structure, by  
392 the side chain of R207 a residue known to be involved in the second and final step of  
393 the reaction catalysed by CoaB – the conversion of the 4'-phosphopantothenoyl-CMP  
394 intermediate to PPC<sup>33</sup>. Considering the role of this residue in the final step of product  
395 formation and that compound **1b** shows uncompetitive inhibition relative to all CoaB  
396 substrates, we propose that the opening of this site occurs upon binding of the final  
397 substrate L-cysteine. Currently it is not clear whether this new allosteric site is exploited  
398 by a natural ligand, as we were unable to identify such a biomolecule. Nevertheless, the  
399 conservation of residues at this site, across a variety of bacteria, indicates that this  
400 feature might be common to many, if not all, bacterial CoaBs.



401 Drug discovery against *M. tuberculosis* is rich in examples of compounds with potent  
402 activity against an essential enzyme but with a complete lack of whole cell activity due  
403 to the impermeable cell wall of this organism, efflux pumps, target modification  
404 enzymes and extensive capacity to metabolise compounds <sup>39</sup>. The modest *in vitro* whole  
405 cell activity displayed by the CoaB inhibitors reported in this work, may relate to any of  
406 these issues. Nevertheless, the biochemical and structural data described herein further  
407 validate CoaBC as a promising novel anti-tubercular drug target by showing a new  
408 allosteric site that can be targeted by potent inhibitors.

409

## 410 **Materials and methods**

### 411 **Cloning and protein purification**

412 *M. tuberculosis* and *M. smegmatis* *coaBC* genes were amplified from genomic DNA of  
413 *M. tuberculosis* H37Rv strain, obtained from ATCC (ATCC25618D-2) and genomic  
414 DNA of *M. smegmatis* *mc*<sup>2</sup> 155, and cloned into a pET28a vector (Novagen), modified  
415 to include an N-terminal 6xHis-SUMO tag. The *M. smegmatis* *coaB* construct was  
416 obtained from the Seattle Structure Genomics Center for Infectious Disease. The same  
417 protein purification protocol was used for both *M. tuberculosis* and *M. smegmatis*  
418 CoaBC constructs.

419 *E. coli* BL21(DE3) containing pET28aSUMO-CoaBC was grown in 2XYT media at 37  
420 °C until an O.D.<sub>600</sub> = 0.6. IPTG was then added to a final concentration of 0.5 mM and  
421 the temperature changed to 18 °C for 18-20h. Cells were then harvested by  
422 centrifugation, re-suspended in 50 mM TRIS pH 8.0, 250 mM NaCl, 20% (w/v)  
423 glycerol, 20 mM imidazole, 5 mM MgCl<sub>2</sub> with protease inhibitors tablets (Roche) and  
424 DNaseI (Sigma). Cells were lysed with an Emulsiflex (Avestin) and the resultant cell  
425 lysate was centrifuged at 27000 *g* for 30 min to remove cell debris. Recombinant

426 CoaBCs were purified with a HiTrap IMAC Sepharose FF column (GE-Healthcare),  
427 equilibrated with 50 mM TRIS pH 8.0, 250 mM NaCl, 20% (w/v) glycerol and 20mM  
428 Imidazole. Elution was performed in the same buffer with 500mM Imidazole. Protein  
429 was dialysed in 25 mM TRIS pH 8 and 150 mM NaCl and the SUMO tag was cleaved  
430 overnight at 4 °C by adding Ulp1 Protease at a 1:100 ratio. CoaBC was concentrated  
431 and loaded on a Superdex 200 column equilibrated with 25 mM TRIS pH 8.0, 150 mM  
432 NaCl. Fraction purity was determined by SDS-page and the purest fractions were  
433 pooled, concentrated to ~10 mg.mL<sup>-1</sup> for MtbCoaBC and 30 mg.mL<sup>-1</sup> for MsmCoaBC,  
434 flash frozen in liquid nitrogen and stored at -80 °C.

435 *E. coli* BL21(DE3) containing the *M. smegmatis* CoaB construct with a N-terminal non-  
436 -cleavable 6xHis tag was grown and harvested as above and re-suspended in 20 mM  
437 HEPES pH 7.0, 500 mM NaCl, 20 mM imidazole, 5 mM MgCl<sub>2</sub> with protease  
438 inhibitors tablets (Roche) and DNaseI (Sigma). Cells were lysed with an Emulsiflex  
439 (Avestin) and cell lysate was centrifuged at 27000 g for 30 mins to remove cell debris.  
440 Recombinant *M. smegmatis* CoaB was purified with a HiTrap IMAC Sepharose FF  
441 column (GE-Healthcare), equilibrated with 20 mM HEPES pH 7.0, 500 mM NaCl and  
442 20 mM imidazole. Elution was carried out in the same buffer with 500 mM imidazole.  
443 Protein was concentrated and loaded on a Superdex 200 column equilibrated with  
444 20mM HEPES pH 7.0 and 500 mM NaCl. Fraction purity was assessed by SDS-page  
445 and the purest fractions were pooled concentrated to 22 mg. mL<sup>-1</sup>, flash frozen in liquid  
446 nitrogen and stored at -80 °C.

447

#### 448 **Native mass spectrometry**

449 Spectra were recorded on a Synapt HDMS mass spectrometer (Waters) modified for  
450 studying high masses. MtCoaBC and MsCoaBC were exchanged into NH<sub>4</sub>OAc (500

451 mM, pH 7.0) solution using Micro Bio-Spin 6 chromatography columns (Bio-Rad). A  
452 sample volume of 2.5  $\mu$ L was injected into a borosilicate emitter (Thermo Scientific) for  
453 sampling. Instrument conditions were optimized to enhance ion desolvation while  
454 minimizing dissociation of macromolecular complexes. Typical conditions were  
455 capillary voltage 1.8–2.0 kV, sample cone voltage 100 V, extractor cone voltage 1 V,  
456 trap collision voltage 60 V, transfer collision voltage 60 V, source temperature 20 °C,  
457 backing pressure 5 mbar, trap pressure  $3\text{--}4 \times 10^{-2}$  mbar, IMS (N<sub>2</sub>) pressure  $5\text{--}6 \times 10^{-1}$   
458 mbar and TOF pressure  $7\text{--}8 \times 10^{-7}$  mbar. Spectra were calibrated externally using  
459 cesium iodide. Data acquisition and processing were performed using MassLynx 4.1  
460 (Waters).

461

## 462 **Crystallization**

463 For both full length *M. smegmatis* CoaBC and CoaB alone, the crystallization screens  
464 and optimization were performed at 18 °C using the sitting-drop vapour diffusion  
465 method. For CoaBC 300 nL of pure protein at 30 mg.mL<sup>-1</sup>, pre-incubated with 3 mM  
466 CTP and 10 mM MgCl<sub>2</sub>, was mixed in 1:1 and 1:2 (protein to reservoir) ratio with well  
467 solution using a mosquito robot (TTP labtech). Initial conditions were obtained in the  
468 Classics lite crystallization screen (Qiagen), solution 1. Crystals obtained in this  
469 condition diffracted poorly, therefore several rounds of optimization were performed.  
470 The final optimised condition consisted of 0.1 M BisTris pH 6.5, 10 mM CoCl<sub>2</sub> 0.8 M  
471 1,6-hexanediol. Crystals appeared after three days in both conditions. A cryogenic  
472 solution was prepared by adding ethylene glycol up to 30% (v/v) to the mother liquor.  
473 Crystals were briefly transferred to this solution, flash frozen in liquid nitrogen and  
474 stored for data collection.

475 For MsmCoaB, 200 nL of pure protein at 22-24 mg.mL<sup>-1</sup> with 10 mM CTP was mixed  
476 in 1:1 ratio with well solution using a Phoenix robot (Art Robbins). Crystals were  
477 obtained in Wizards classics III&IV (Rigaku) solution G4 consisting of 20% (w/v) PEG  
478 8000, 0.1 M MES pH 6.0 and 0.2 M calcium acetate. Crystals appeared after 2 days.  
479 To obtain ligand-bound structures, soaking was performed condition using the hanging-  
480 drop vapour-diffusion method as follows: 2 µL of a solution containing 20% (w/v) PEG  
481 8000, 0.1M MES pH 6.0, 0.2 M calcium acetate, 0.25 M NaCl 10% (v/v) DMSO and  
482 1-5 mM inhibitors was left to equilibrate against 500 µL of reservoir solution for 3 days.  
483 Crystals were then transferred to the pre-equilibrated drops and incubated for 24 h. A  
484 cryogenic solution was prepared by adding 2-methyl-2,4-pentanediol up to 25% (v/v) to  
485 mother liquor. Crystals were briefly transferred to this solution, flash frozen in liquid  
486 nitrogen and stored for data collection.

487

#### 488 **Data collection and processing**

489 The data sets were collected at stations I02 and I03 at Diamond Light Source (Oxford,  
490 UK). The diffraction images were processed with AutoPROC<sup>40</sup> using XDS<sup>41</sup> for  
491 indexing and integration with AIMLESS<sup>42</sup> and TRUNCATE<sup>43</sup> from CCP4 Suite<sup>44</sup> for  
492 data reduction, scaling and calculation of structure factor amplitudes and intensity  
493 statistics.

494

#### 495 **Structure solution and refinement**

496 MsmCoaB and MsmCoaBC structures were solved by molecular replacement using  
497 PHASER<sup>45</sup> from the PHENIX software package<sup>46</sup>. For MsmCoaB, the atomic  
498 coordinates of MsmCoaB structure (PDB entry 4QJI) were used as a search model.  
499 Ligand bound structures were solved using our highest resolution MsmCoaB apo form

500 structure (PDB entry 6TH2). For MsmCoaBC, atomic coordinates of *Arabidopsis*  
501 *thaliana* CoaC (PDB entry 1MVL)<sup>19</sup> and our highest resolution CoaB structure (PDB  
502 entry 6TH2) were used as search models. Model building was done with Coot<sup>47</sup> and  
503 refinement was performed in PHENIX<sup>46</sup>. Structure validation was performed using  
504 Coot and PHENIX tools<sup>46,47</sup>. All figures were prepared using Pymol (The PyMOL  
505 Molecular Graphics System, Version 2.0 Schrödinger, LLC.) and ligand interactions  
506 calculated with Arpeggio<sup>48</sup>.

507

508

### 509 **High-throughput screening**

510 Potential inhibitors of CoaBC were assessed at room temperature using a PHERAstar  
511 microplate reader (BMG Labtech). Pyrophosphate produced by CoaB was converted to  
512 two molecules of inorganic phosphate using a pyrophosphatase. Phosphate was then  
513 detected using the BIOMOL® Green reagent (Enzo Life Sciences), which when bound  
514 to phosphate absorbs light at 650 nm. An end-point assay was carried out in clear, flat-  
515 bottom, polystyrene, 384-well plates (Greiner) in an 50 µl reaction volume containing  
516 100 mM TRIS, pH 7.6, 1 mM MgCl<sub>2</sub>, 1 mM TCEP, 0.03 U/mL pyrophosphatase, 2 µM  
517 CTP, 40 µM L-cysteine, 30 µM PPA and 30 nM MtbCoaBC. Assays were performed  
518 by adding 25 µL of a 2-times concentrated reaction mixture containing all components  
519 with the exception of the enzymes to all wells, and the reactions started by adding 25 µL  
520 of a 2-times concentrated enzyme mixture. The reaction was carried out for 2 h at room  
521 temperature, before 50 µL of BIOMOL® Green reagent was added and incubated for a  
522 further 20 min prior to reading.

523

524 **Inorganic pyrophosphatase-purine nucleoside phosphorylase PNP-PPIase assay.**

525 The commercially available EnzChek pyrophosphate assay kit (E-6645) (Life  
526 Technologies) was used for this assay. The final reaction composition used was 0.03  
527 U/mL inorganic pyrophosphatase, 1 U/mL purine nucleoside phosphorylase, 1 mM  
528 MgCl<sub>2</sub>, 200 μM MESG, 100 mM TRIS pH 7.5, 1 mM TCEP, 32 nM MtbCoaBC, 125  
529 μM CTP, 125 μM PPA, 500 μM L-cysteine, and various concentrations of compounds  
530 being tested for inhibition, all prepared from DMSO stock solutions (compounds of  
531 series one and two) or water (CoA and CoA thioesters). Assays were performed on  
532 either a CLARIOstar or PHERAstar microplate reader (BMG Labtech) in 96-well plates  
533 (Greiner). A substrate mixture containing the substrates and the inhibitor was pre-  
534 incubated at 25 °C for 10 min. An enzyme solution was prepared and separately pre-  
535 incubated at 25 °C for 10 min. The reaction was initiated by the addition of the  
536 substrates to the solution containing the enzyme to a final volume of 75 μL. Enzymatic  
537 activity was monitored by following the absorbance at 360 nm for 30 min (100  
538 cycles/20 s each cycle). Assays were performed in triplicates, including a negative  
539 control (lacking PPA) and a positive control (lacking inhibitor).

540 Competition assays were performed using the same conditions but with variable  
541 substrate concentrations (31.25 μM, 62.5 μM, 125 μM, 250 μM and 500 μM for CTP  
542 and PPA, 31.25 μM, 62.5 μM, 93.75 μM 125 μM and 250 μM for L-cysteine).

543

544 ***M. tuberculosis* strains and growth conditions**

545 MIC determination for *M. tuberculosis* H37RvMA was performed as previously  
546 described<sup>49</sup> in the following media: 7H9/ADC/glycerol (4.7 g/L Difco Middlebrook  
547 7H9 base, 100mL/L Middlebrook albumin (BSA)-dextrose-catalase (ADC) Difco  
548 Middlebrook, 0.2% glycerol and 0.05% Tween-80), 7H9/Cholesterol/Tyloxapol (4.7

549 g/L 7H9 base, 0.81 g/L NaCl, 24 mg/L cholesterol, 5 g/L BSA fraction V and 0.05%  
550 Tyloxapol) and GAST/Fe (0.3 g/L of Bacto Casitone (Difco), 4.0 g/L of dibasic  
551 potassium phosphate, 2.0 g/L of citric acid, 1.0 g/L of L-alanine, 1.2 g/L of magnesium  
552 chloride hexahydrate, 0.6 g/L of potassium sulfate, 2.0 g/L of ammonium chloride, 1.80  
553 ml/L of 10 N sodium hydroxide, 10.0 ml of glycerol 0.05% Tween 80 and 0.05 g of  
554 ferric ammonium citrate adjusted to pH 6.6).

555

556

557

558

## 559 **Figure Legends**

560

### 561 **Figure 1: X-ray crystal structure of FMN and CTP bound MsmCoaBC.**

562 (A) Full aspect of the dodecameric CoaBC with CoaC represented in teal and CoaB in  
563 gold. (B) View of a CoaBC dimer with FMN and CTP shown. Each protomer is  
564 coloured differently. The CoaC active site flexible flap is highlighted in blue. (C) In the  
565 left panel, a CoaBC trimer is shown with the CoaC coloured in teal and CoaB in gold.  
566 On the right panel dimerization of two CoaBC trimers is shown with CoaC coloured in  
567 teal or grey for different trimers. Each CoaB forms a dimer with protomers from  
568 different trimers.

569

### 570 **Figure 2: Detailed view of MsmCoaBC active sites and MsmCoaB dimerisation** 571 **interface.**

572 (A) View of CoaC active site with FMN bound. The active site sits between two  
573 protomers of one trimer (gold and pink) and a third protomer from an adjacent trimer

574 (green). Hydrogen bonds are depicted in yellow and  $\pi$ -interactions are in blue. (B)  
575 Superposition of a CoaB crystal structure in green, with full length CoaBC (teal)  
576 showing the active site flaps (brown) of the CoaB and CoaC enzymes. (C) Detailed  
577 view of the CTP binding site. Cartoon and residues belonging to each protomer are  
578 coloured differently. Hydrogen bonds and  $\pi$ -interactions are coloured as in B. Important  
579 waters are represented as red spheres and calcium as a green sphere. Calcium  
580 coordination is depicted in purple. (D) CoaB dimerization interface. Each protomer is  
581 coloured as in C. (D)

582

583 **Figure 3: Regulation of MtbCoaBC by CoA and CoA thioesters.**

584 (A) Inhibition of MtbCoaBC by CoA, acetyl-CoA, malonyl-CoA and succinyl-CoA. (B)  
585 Lineweaver-Burk plots showing the effect of varying the concentration of each substrate  
586 in the presence of different concentrations of acetyl-CoA. Error bars represent standard  
587 deviation with  $n = 3$ .

588

589 **Figure 4: Inhibition of MtbCoaBC by compounds 1b and 2b.**

590 (A) Dose response profiles and chemical structure of compounds **1b** and **2b** is shown.  
591 (B and C) Lineweaver-Burk plots respectively showing the effect of varying  
592 concentrations of compound **1b** and **2b** in the presence of varying concentrations of  
593 CTP, PPA and L-cysteine. Error bars represent standard deviation with  $n = 3$ .

594

595 **Figure 5: MsmCoaB X-ray structure showing the cryptic allosteric site.**

596 CoaB with the cryptic allosteric site closed (A) and opened conformation (B) with  
597 compound **1b** (pink) bound. (C) Detailed view of the allosteric site with compound **1b**  
598 (yellow) bound. The individual protomers of the CoaB dimer are coloured in green or



599 pink. Hydrogen bonds are depicted in red,  $\pi$ -interactions are in grey, and hydrophobic  
600 interaction in green. Important waters are represented as red spheres and calcium as a  
601 green sphere. Calcium coordination is depicted in purple. (D) Gating mechanism of the  
602 cryptic allosteric site showing the movement of R207 with the closed conformation in  
603 yellow and the open conformation in pink. An *E. coli* structure (PDB code: 1U7Z) with  
604 the 4'-phosphopantothenoyl-CMP (purple) intermediate bound is superimposed.

605

606 **Figure 6: Docking of compound 2b into MsmCoaB showing the highest scoring**  
607 **pose.** Hydrogen bonds are shown in red. The individual protomers of the CoaB dimer  
608 are either coloured in green or pink.

#### 609 **Tables**

610

611 **Table 1:** Inhibition of CoaB domain by CoA, CoA thioesters and the most potent  
612 inhibitors from of series one and two. IC<sub>50</sub> values determined using the EnzChek  
613 pyrophosphate assay are shown. Error represents standard deviation with n = 3.

| Compound  | IC <sub>50</sub> EnzChek<br>( $\mu$ M) |
|-----------|----------------------------------------|
| CoA       | 148 $\pm$ 11                           |
| AcCoA     | 121 $\pm$ 9                            |
| MiCoA     | 49 $\pm$ 3                             |
| SucCoA    | 38 $\pm$ 2                             |
| <b>1b</b> | 0.28 $\pm$ 0.05                        |
| <b>1c</b> | 4.6 $\pm$ 0.4                          |
| <b>2b</b> | 0.08 $\pm$ 0.01                        |
| <b>2c</b> | 0.41 $\pm$ 0.03                        |
| <b>2d</b> | 0.54 $\pm$ 0.06                        |
| <b>2e</b> | 3.0 $\pm$ 0.2                          |

614

615

616 **Table 2:** Inhibitor constants of acetyl-CoA, compound **1b** and **2b** for the three CoaB  
617 substrates. Error represents standard deviation with n = 3.

| Inhibitor    | Variable substrate | $K_i$ ( $\mu\text{M}$ ) | Inhibition type <sup>#</sup> |
|--------------|--------------------|-------------------------|------------------------------|
| <b>AcCoA</b> | CTP                | $22.5 \pm 1.7$          | C                            |
|              | PPA                | $22.4 \pm 1.4$          | C                            |
|              | L-cysteine         | $62.5 \pm 3.3$          | NC                           |
| <b>1b</b>    | CTP                | $*0.222 \pm 0.012$      | UC                           |
|              | PPA                | $*0.078 \pm 0.005$      | UC                           |
|              | L-cysteine         | $*0.173 \pm 0.007$      | UC                           |
| <b>2b</b>    | CTP                | $0.093 \pm 0.018$       | Mixed                        |
|              | PPA                | $*0.062 \pm 0.004$      | UC                           |
|              | L-cysteine         | $*0.049 \pm 0.003$      | UC                           |

618 \* - For uncompetitive inhibitors  $\alpha K_i$  product is shown.

619 # - Abbreviations: C – competitive inhibition; NC – non-competitive inhibition; UC –  
620 uncompetitive inhibition.

621 **Table 3:** Minimum inhibitory concentration (MIC) values of CoaB inhibitors against  
622 *M. tuberculosis* H37Rv cultured in different media ( $\mu\text{M}$ ).

| Compound  | 7H9/ADC/<br>Glycerol | 7H9/<br>Cholesterol/<br>Tyloxapol | GAST/<br>Fe |
|-----------|----------------------|-----------------------------------|-------------|
| <b>1b</b> | >250                 | >250                              | 125         |
| <b>1c</b> | >250                 | ND                                | ND          |
| <b>2b</b> | >250                 | >250                              | 50          |
| <b>2c</b> | >250                 | >250                              | 125         |
| <b>2d</b> | >250                 | >250                              | ND          |
| <b>2e</b> | >250                 | ND                                | ND          |

623 \*ND – Not determined.

624

625

## 626 Acknowledgements

627 This work was funded by the Bill and Melinda Gates Foundation HIT-TB (OPP  
628 OPP1024021) and SHORTEN-TB (OPP1158806) (VMendes and JCE) and in part by  
629 the Intramural Research Program of NIH, NIAID (HIMB and CEB) and the South  
630 African Medical Research Council and National Research Foundation (VMizrahi). CS

631 was funded in part by a NHMRC Overseas Biomedical Fellowship (1016357) and in  
632 part by the Bill and Melinda Gates Foundation HIT-TB (OPP OPP1024021). CoaBC  
633 screening was funded by a MRC-CinC (grant no. MC\_PC\_14099). TLB is funded by  
634 the Wellcome Trust (Wellcome Trust Investigator Award 200814\_Z\_16\_Z: RG83114).  
635 The authors would like to thank the Diamond Light Source for beam-time (proposals  
636 mx9537, mx14043, mx18548), the Seattle Structural Genomics Centre for Infectious  
637 Disease for kindly providing the *M. smegmatis* CoaB plasmid and Dr Nuno Empadinhs  
638 for graciously providing the DNA of *M. smegmatis* mc<sup>2</sup> 155.

639

640

## 641 **References**

- 642 1. World Health, O. *Global tuberculosis report 2019*, (World Health Organization, Geneva,  
643 2019).
- 644 2. Strauss, E. Coenzyme A Biosynthesis and Enzymology. *Comprehensive Natural Products*  
645 *li: Chemistry and Biology, Vol 7: Cofactors*, 351-410 (2010).
- 646 3. Leonardi, R. & Jackowski, S. Biosynthesis of Pantothenic Acid and Coenzyme A. *EcoSal*  
647 *Plus* **2**(2007).
- 648 4. Tsuchiya, Y. et al. Protein CoAlation and antioxidant function of coenzyme A in  
649 prokaryotic cells. *Biochem J* **475**, 1909-1937 (2018).
- 650 5. Choudhary, C. et al. Lysine acetylation targets protein complexes and co-regulates  
651 major cellular functions. *Science* **325**, 834-40 (2009).
- 652 6. Beld, J., Sonnenschein, E.C., Vickery, C.R., Noel, J.P. & Burkart, M.D. The  
653 phosphopantetheinyl transferases: catalysis of a post-translational modification crucial  
654 for life. *Nat Prod Rep* **31**, 61-108 (2014).
- 655 7. Wang, M. & Casey, P.J. Protein prenylation: unique fats make their mark on biology.  
656 *Nat Rev Mol Cell Biol* **17**, 110-22 (2016).
- 657 8. Bird, J.G. et al. The mechanism of RNA 5' capping with NAD<sup>+</sup>, NADH and desphospho-  
658 CoA. *Nature* **535**, 444-7 (2016).
- 659 9. Marrakchi, H., Laneelle, M.A. & Daffe, M. Mycolic acids: structures, biosynthesis, and  
660 beyond. *Chem Biol* **21**, 67-85 (2014).
- 661 10. Guerrini, V. et al. Storage lipid studies in tuberculosis reveal that foam cell biogenesis  
662 is disease-specific. *PLoS Pathog* **14**, e1007223 (2018).
- 663 11. Peyron, P. et al. Foamy macrophages from tuberculous patients' granulomas  
664 constitute a nutrient-rich reservoir for *M. tuberculosis* persistence. *PLoS Pathog* **4**,  
665 e1000204 (2008).
- 666 12. Evans, J.C. et al. Validation of CoaBC as a Bactericidal Target in the Coenzyme A  
667 Pathway of Mycobacterium tuberculosis. *ACS Infect Dis* **2**, 958-968 (2016).
- 668 13. Kupke, T. et al. Molecular characterization of lantibiotic-synthesizing enzyme EpiD  
669 reveals a function for bacterial Dfp proteins in coenzyme A biosynthesis. *J Biol Chem*  
670 **275**, 31838-46 (2000).

- 671 14. White, M.D. et al. UbiX is a flavin prenyltransferase required for bacterial ubiquinone  
672 biosynthesis. *Nature* **522**, 502-6 (2015).
- 673 15. Blaesse, M., Kupke, T., Huber, R. & Steinbacher, S. Crystal structure of the peptidyl-  
674 cysteine decarboxylase EpiD complexed with a pentapeptide substrate. *EMBO J* **19**,  
675 6299-310 (2000).
- 676 16. Blaesse, M., Kupke, T., Huber, R. & Steinbacher, S. Structure of MrsD, an FAD-binding  
677 protein of the HFCD family. *Acta Crystallogr D Biol Crystallogr* **59**, 1414-21 (2003).
- 678 17. Albert, A. et al. The X-ray structure of the FMN-binding protein AtHal3 provides the  
679 structural basis for the activity of a regulatory subunit involved in signal transduction.  
680 *Structure* **8**, 961-9 (2000).
- 681 18. Manoj, N. & Ealick, S.E. Unusual space-group pseudosymmetry in crystals of human  
682 phosphopantothenoylcysteine decarboxylase. *Acta Crystallogr D Biol Crystallogr* **59**,  
683 1762-6 (2003).
- 684 19. Steinbacher, S. et al. Crystal structure of the plant PPC decarboxylase AtHAL3a  
685 complexed with an ene-thiol reaction intermediate. *J Mol Biol* **327**, 193-202 (2003).
- 686 20. Stanitzek, S., Augustin, M.A., Huber, R., Kupke, T. & Steinbacher, S. Structural basis of  
687 CTP-dependent peptide bond formation in coenzyme A biosynthesis catalyzed by  
688 *Escherichia coli* PPC synthetase. *Structure* **12**, 1977-88 (2004).
- 689 21. Manoj, N., Strauss, E., Begley, T.P. & Ealick, S.E. Structure of human  
690 phosphopantothenoylcysteine synthetase at 2.3 Å resolution. *Structure* **11**, 927-36  
691 (2003).
- 692 22. Zheng, P. et al. Crystallographic Analysis of the Catalytic Mechanism of  
693 Phosphopantothenoylcysteine Synthetase from *Saccharomyces cerevisiae*. *J Mol Biol*  
694 (2019).
- 695 23. Kupke, T. Molecular characterization of the 4'-phosphopantothenoylcysteine  
696 synthetase domain of bacterial dfp flavoproteins. *J Biol Chem* **277**, 36137-45 (2002).
- 697 24. Chan, D.S.-H. et al. Structural insights into *Escherichia coli*  
698 phosphopantothenoylcysteine synthetase by native ion mobility–mass spectrometry.  
699 *Biochemical Journal* **476**, 3125-3139 (2019).
- 700 25. Strauss, E., Kinsland, C., Ge, Y., McLafferty, F.W. & Begley, T.P.  
701 Phosphopantothenoylcysteine synthetase from *Escherichia coli*. Identification and  
702 characterization of the last unidentified coenzyme A biosynthetic enzyme in bacteria. *J*  
703 *Biol Chem* **276**, 13513-6 (2001).
- 704 26. Awasthy, D. et al. Essentiality and functional analysis of type I and type III  
705 pantothenate kinases of *Mycobacterium tuberculosis*. *Microbiology* **156**, 2691-701  
706 (2010).
- 707 27. Song, W.J. & Jackowski, S. Kinetics and regulation of pantothenate kinase from  
708 *Escherichia coli*. *J Biol Chem* **269**, 27051-8 (1994).
- 709 28. Vallari, D.S., Jackowski, S. & Rock, C.O. Regulation of pantothenate kinase by coenzyme  
710 A and its thioesters. *J Biol Chem* **262**, 2468-71 (1987).
- 711 29. Wubben, T.J. & Mesecar, A.D. Kinetic, thermodynamic, and structural insight into the  
712 mechanism of phosphopantetheine adenylyltransferase from *Mycobacterium*  
713 *tuberculosis*. *J Mol Biol* **404**, 202-19 (2010).
- 714 30. Miller, J.R. et al. Phosphopantetheine adenylyltransferase from *Escherichia coli*:  
715 investigation of the kinetic mechanism and role in regulation of coenzyme A  
716 biosynthesis. *J Bacteriol* **189**, 8196-205 (2007).
- 717 31. Bennett, B.D. et al. Absolute metabolite concentrations and implied enzyme active site  
718 occupancy in *Escherichia coli*. *Nat Chem Biol* **5**, 593-9 (2009).
- 719 32. Moolman, W.J., de Villiers, M. & Strauss, E. Recent advances in targeting coenzyme A  
720 biosynthesis and utilization for antimicrobial drug development. *Biochem Soc Trans* **42**,  
721 1080-6 (2014).

- 722 33. Kupke, T. Active-site residues and amino acid specificity of the bacterial 4'-  
723 phosphopantothencysteine synthetase CoaB. *Eur J Biochem* **271**, 163-72 (2004).
- 724 34. Spry, C., Kirk, K. & Saliba, K.J. Coenzyme A biosynthesis: an antimicrobial drug target.  
725 *FEMS Microbiol Rev* **32**, 56-106 (2008).
- 726 35. Olzhausen, J., Moritz, T., Neetz, T. & Schuller, H.J. Molecular characterization of the  
727 heteromeric coenzyme A-synthesizing protein complex (CoA-SPC) in the yeast  
728 *Saccharomyces cerevisiae*. *FEMS Yeast Res* **13**, 565-73 (2013).
- 729 36. Ruiz, A. et al. Moonlighting proteins Hal3 and Vhs3 form a heteromeric PPCDC with  
730 Ykl088w in yeast CoA biosynthesis. *Nat Chem Biol* **5**, 920-8 (2009).
- 731 37. Yun, M. et al. Structural basis for the feedback regulation of *Escherichia coli*  
732 pantothenate kinase by coenzyme A. *J Biol Chem* **275**, 28093-9 (2000).
- 733 38. Hartl, J., Kiefer, P., Meyer, F. & Vorholt, J.A. Longevity of major coenzymes allows  
734 minimal de novo synthesis in microorganisms. *Nat Microbiol* **2**, 17073 (2017).
- 735 39. Nguyen, L. & Pieters, J. Mycobacterial subversion of chemotherapeutic reagents and  
736 host defense tactics: challenges in tuberculosis drug development. *Annu Rev*  
737 *Pharmacol Toxicol* **49**, 427-53 (2009).
- 738 40. Vonrhein, C. et al. Data processing and analysis with the autoPROC toolbox. *Acta*  
739 *Crystallogr D Biol Crystallogr* **67**, 293-302 (2011).
- 740 41. Kabsch, W. Xds. *Acta Crystallogr D Biol Crystallogr* **66**, 125-32 (2010).
- 741 42. Evans, P.R. & Murshudov, G.N. How good are my data and what is the resolution? *Acta*  
742 *Crystallographica Section D-Biological Crystallography* **69**, 1204-1214 (2013).
- 743 43. French, S. & Wilson, K. Treatment of Negative Intensity Observations. *Acta*  
744 *Crystallographica Section A* **34**, 517-525 (1978).
- 745 44. Winn, M.D. et al. Overview of the CCP4 suite and current developments. *Acta*  
746 *Crystallogr D Biol Crystallogr* **67**, 235-42 (2011).
- 747 45. McCoy, A.J. et al. Phaser crystallographic software. *J Appl Crystallogr* **40**, 658-674  
748 (2007).
- 749 46. Adams, P.D. et al. PHENIX: a comprehensive Python-based system for macromolecular  
750 structure solution. *Acta Crystallogr D Biol Crystallogr* **66**, 213-21 (2010).
- 751 47. Emsley, P., Lohkamp, B., Scott, W.G. & Cowtan, K. Features and development of Coot.  
752 *Acta Crystallogr D Biol Crystallogr* **66**, 486-501 (2010).
- 753 48. Jubb, H.C. et al. Arpeggio: A Web Server for Calculating and Visualising Interatomic  
754 Interactions in Protein Structures. *J Mol Biol* **429**, 365-371 (2017).
- 755 49. Singh, V. et al. The complex mechanism of antimycobacterial action of 5-fluorouracil.  
756 *Chem Biol* **22**, 63-75 (2015).

757

## 758 **Author contributions**

759 VMendes wrote the manuscript. VMendes designed and performed all the  
760 crystallographic experiments with the help of MB, OB and JCW. VMendes and JH  
761 designed and performed the kinetic experiments. JH synthesised 4'-  
762 phosphopantothenate. PHMT performed docking experiments. DSC performed the  
763 native mass spectrometry experiments. SG, TB, SON, SD, JP and CS developed and  
764 performed the high-throughput screening. JCE, SLL and HIMB performed the

765 microbiology experiments on *M. tuberculosis* H37Rv. VMendes, JCE, SG, AGC, PCR,  
766 KYR, CA, HIMB, CEB, VMizrahi, PGW and TLB managed the project. All authors  
767 approved the manuscript.

768

769 **Accession numbers**

770 Coordinates and structure factors related to this work have been deposited in the PDB  
771 with accession numbers: **6TGV**, **6TH2** and **6THC**.

Figure 1

A

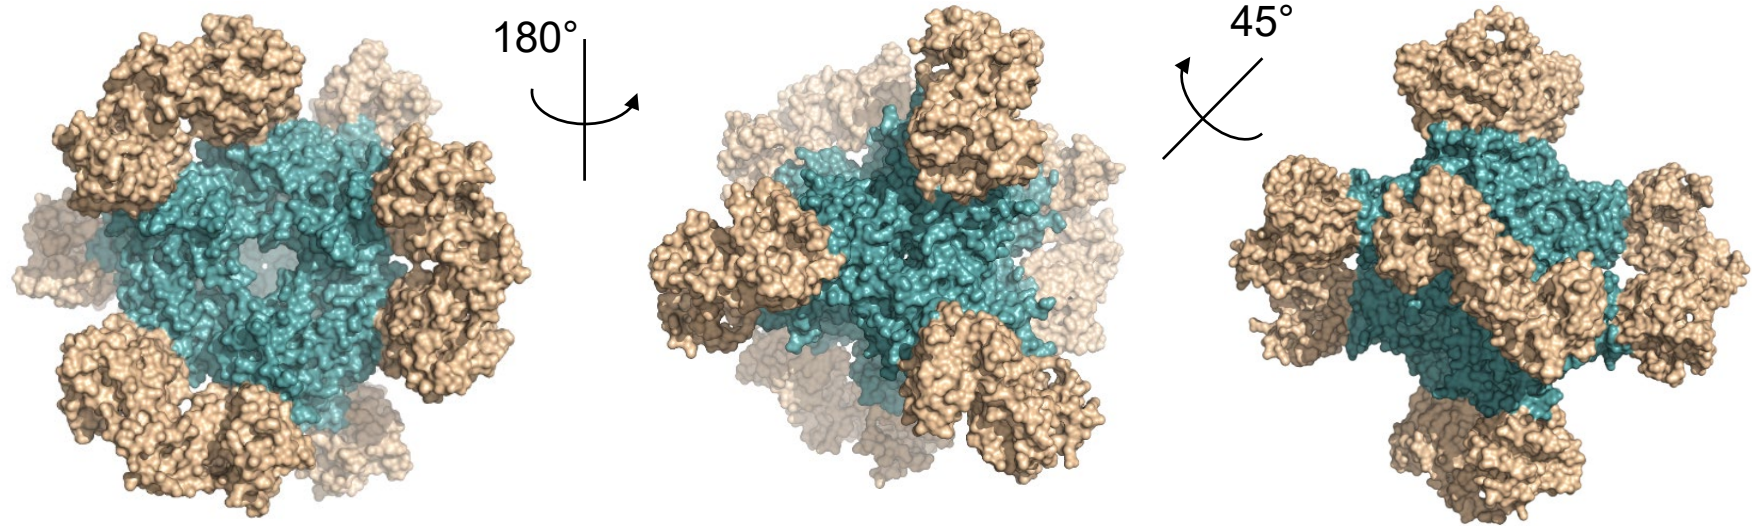

B

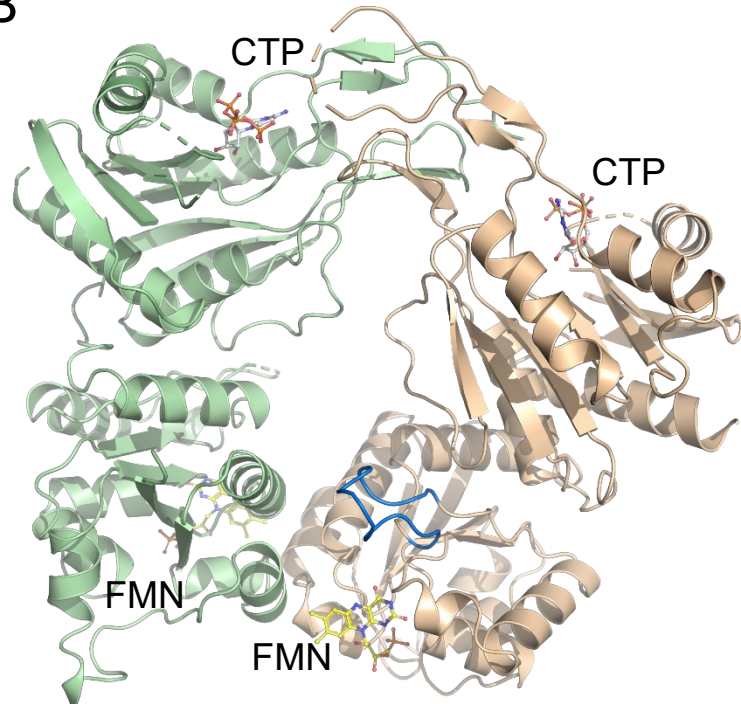

C

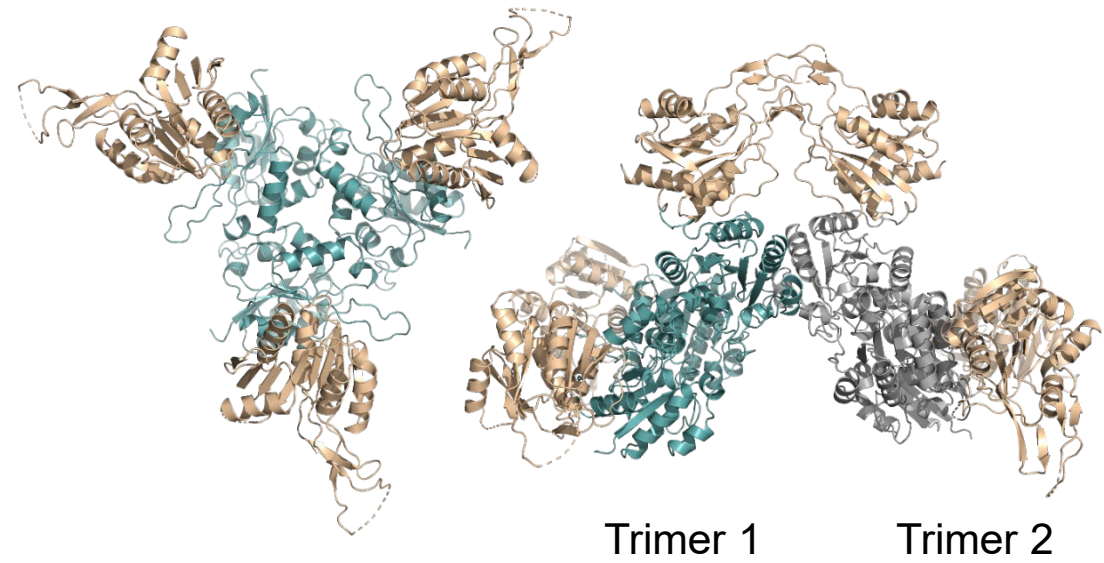

Figure 2

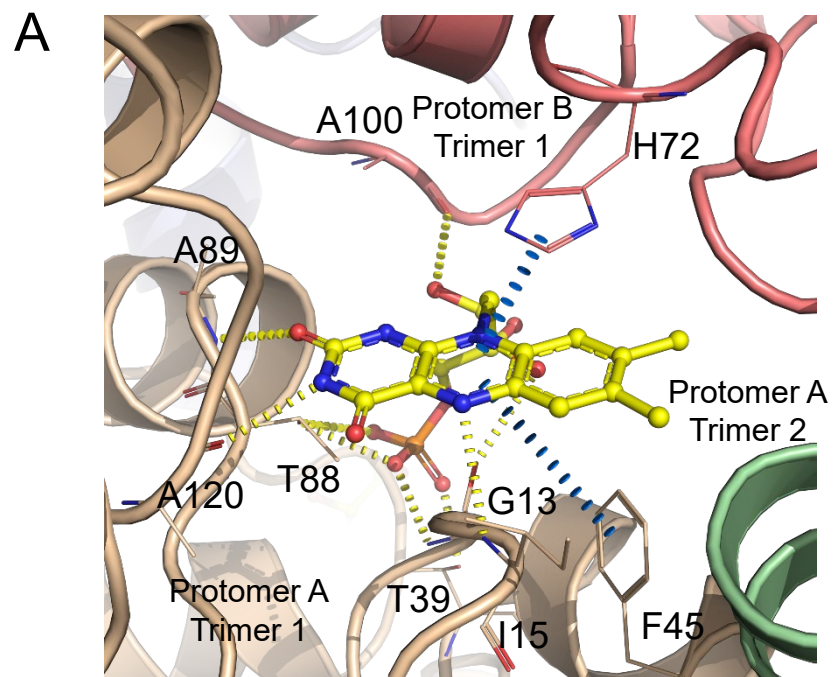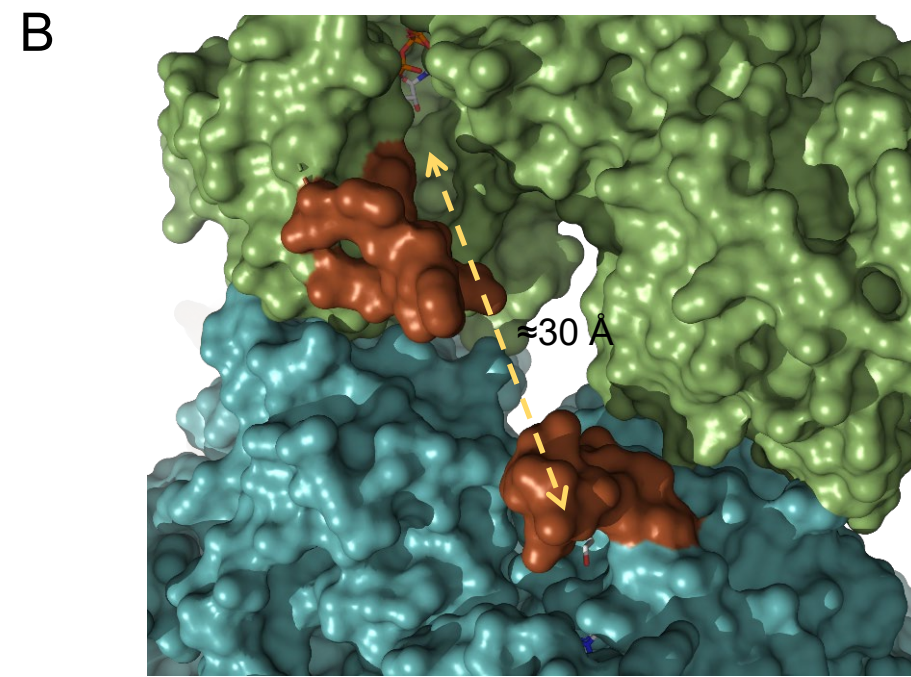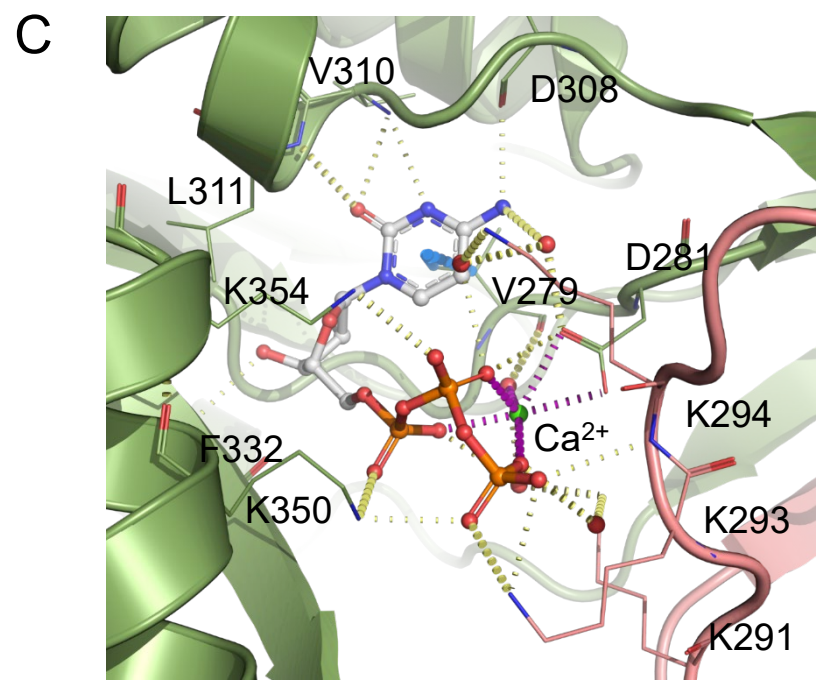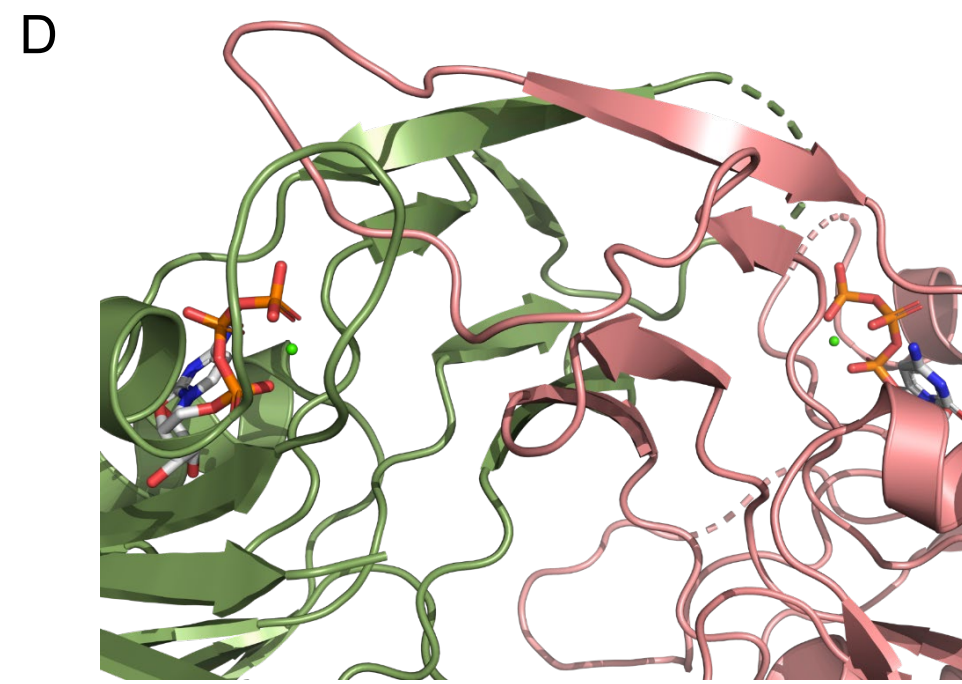



Figure 3

A

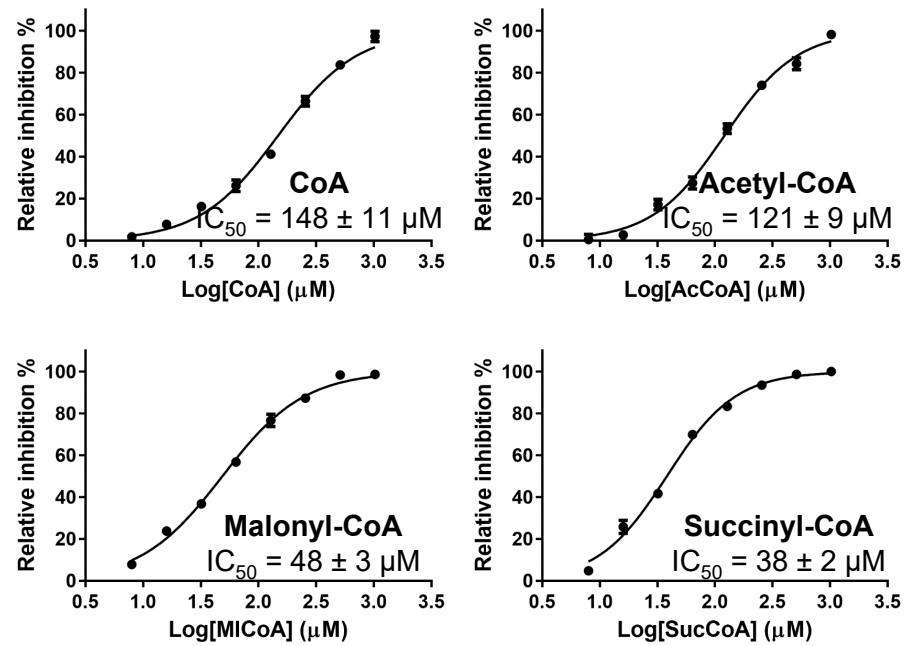

B

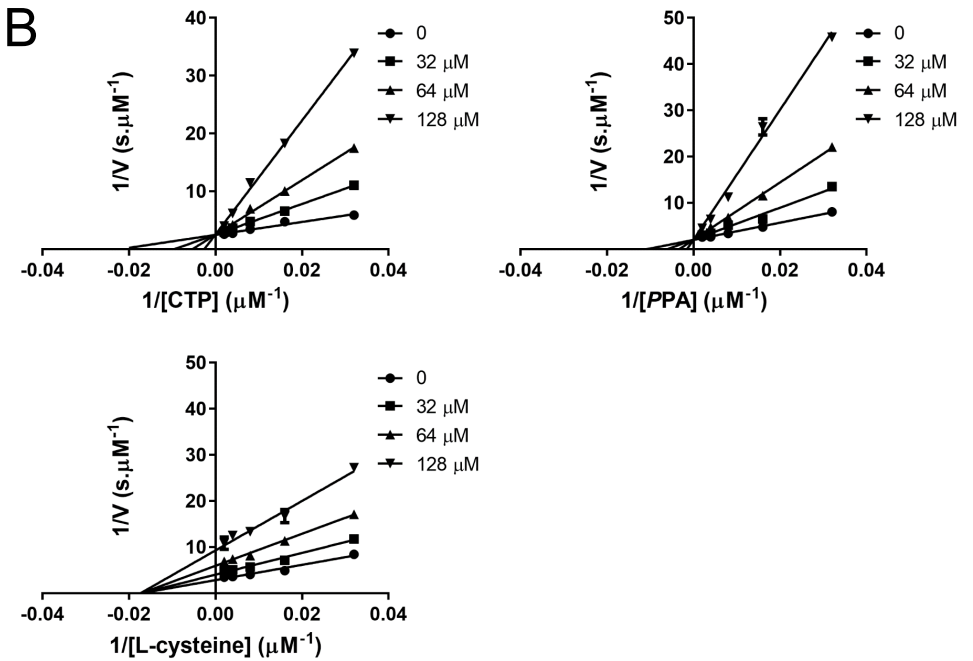

Figure 4

A

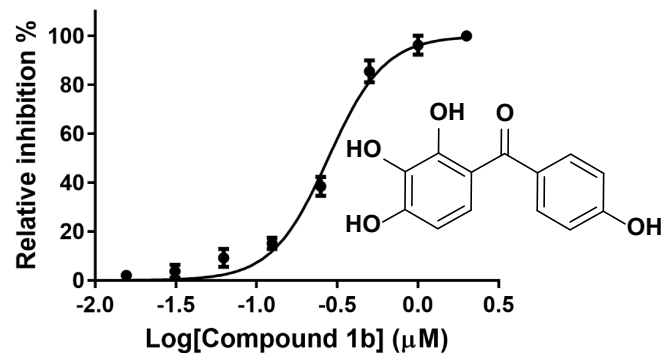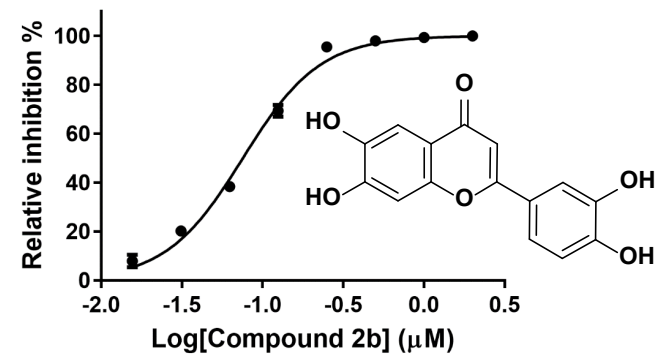

B

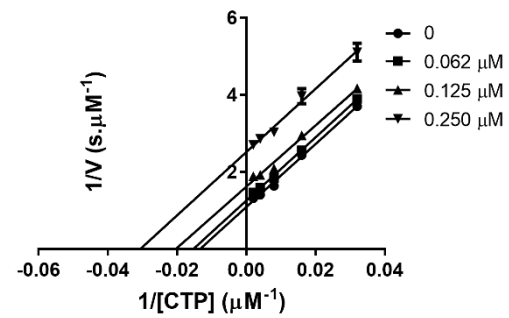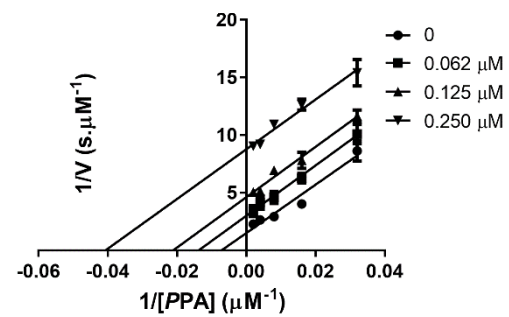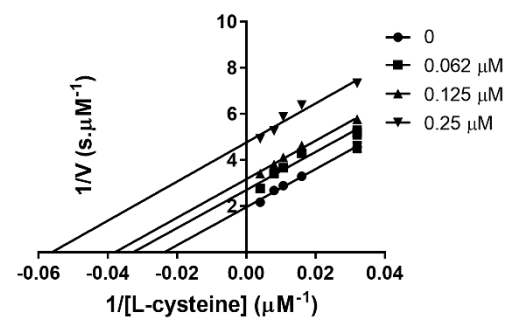

C

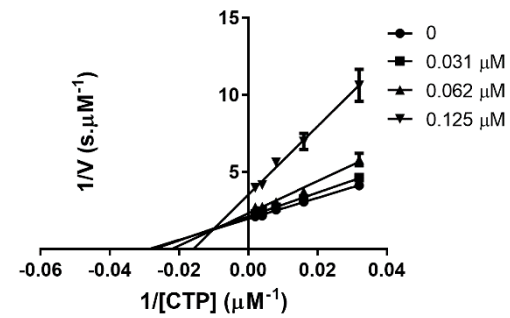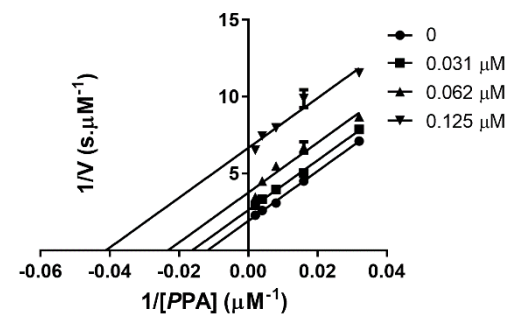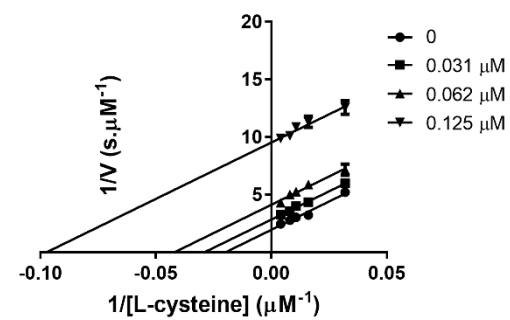

Figure 5

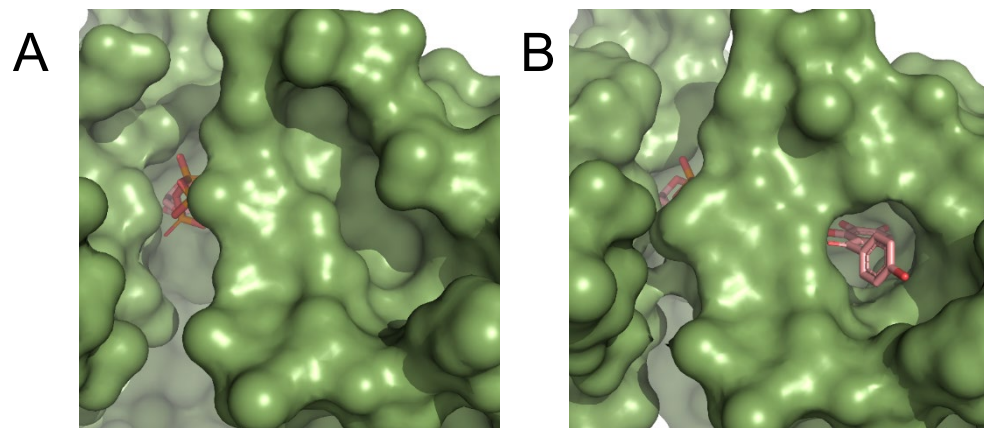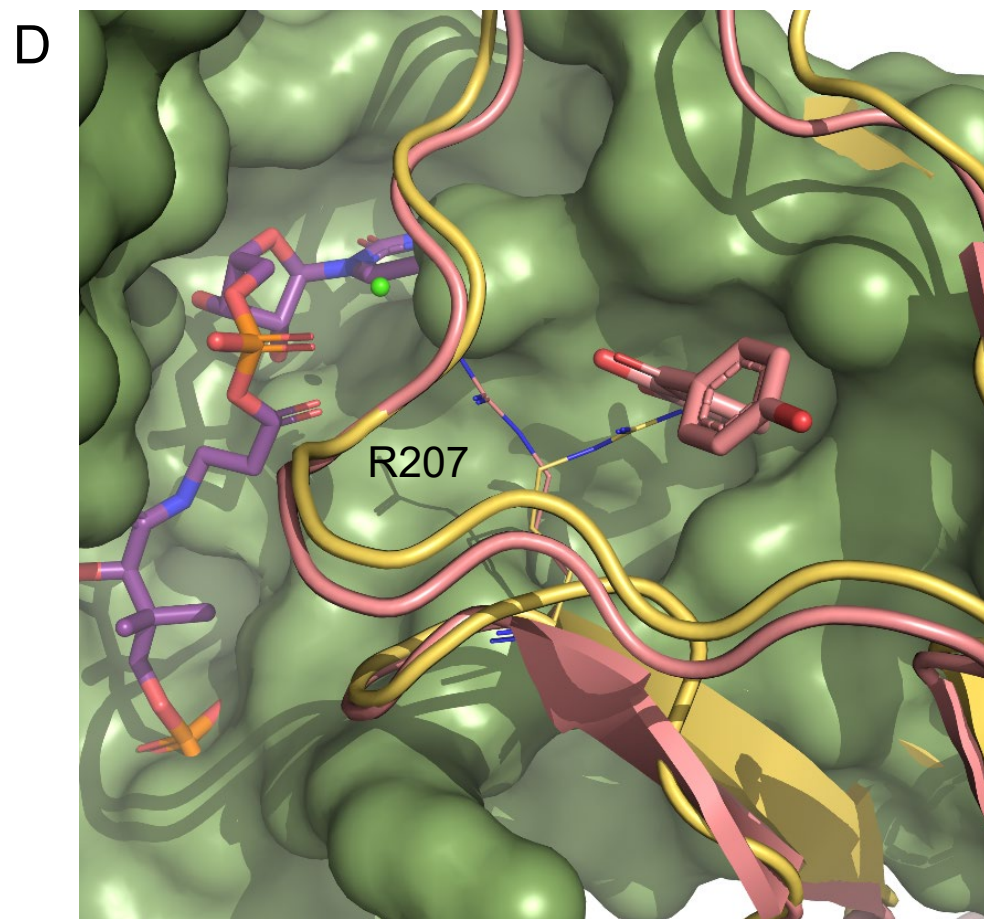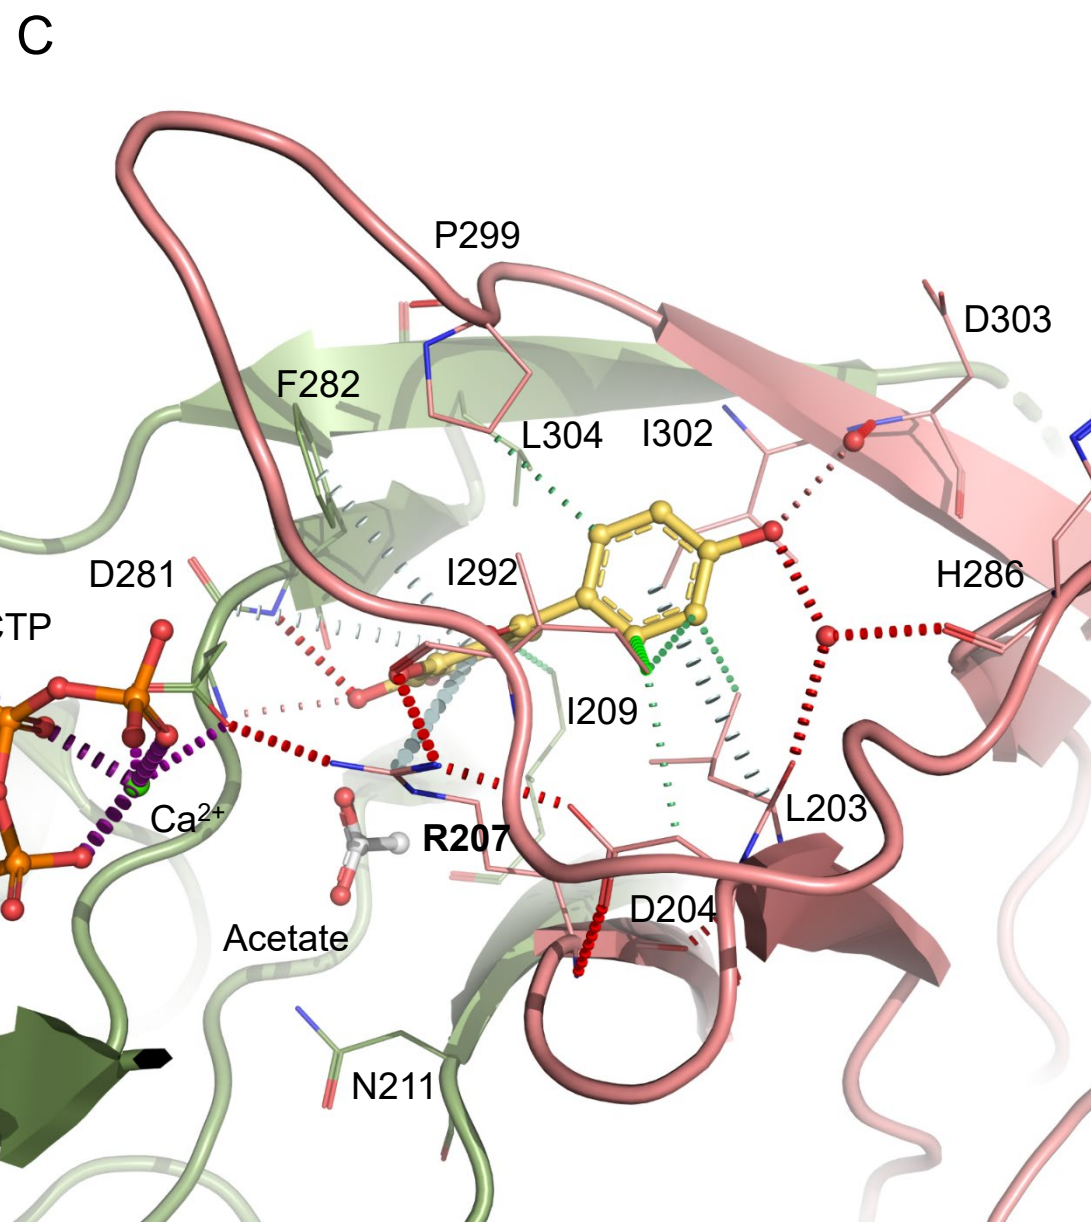

Figure 6

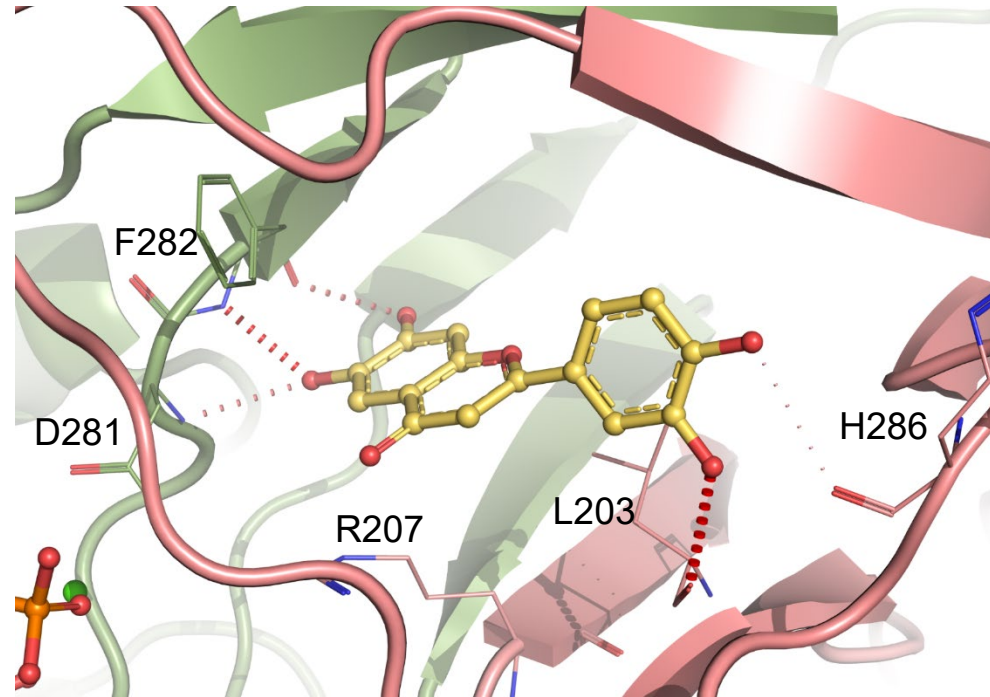

Source: https://www.biorxiv.org/content/10.1101/870154v3.full.pdf
